# Supplementary material for: Antarctic ice sheet model comparison with uncurated geological constraints shows that higher spatial resolution improves deglacial reconstructions
Source: Copernicus journal article supplement (doi:10.5194/tc-20-931-2026), 2026-02-04
Supplement: Supplementary file [file tc-20-931-2026-supplement-title-page.pdf › tc-20-931-2026-supplement-title-page.pdf]

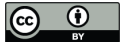

## *Supplement of*

# **Antarctic ice sheet model comparison with uncurated geological constraints shows that higher spatial resolution improves deglacial reconstructions**

**Anna Ruth W. Halberstadt and Greg Balco**

*Correspondence to:* Anna Ruth W. Halberstadt (arhalberstadt@gmail.com)

- tc-20-931-2026-supplement-title-page.pdf
- Suppl
  - LGM-max-thk.mat
  - geochron-constraints.mat
  - readme-LGM-max-thk.txt
  - readme-geochron-constraints.txt

The copyright of individual parts of the supplement might differ from the article licence.
